# Supplementary material for: Short-Term Associations of Fine Particulate Matter and Synoptic Weather Types with Cardiovascular Mortality: An Ecological Time-Series Study in Shanghai, China
Source: PubMed Central journal article supplement (PMC7038017; doi:10.3390/ijerph17031111), 2020-02-10
Supplement: ijerph-17-01111-s001.pdf [file ijerph-17-01111-s001.pdf]

**Table S1.** Meteorological characteristics of the six synoptic weather types (SWT) in Shanghai, 2012-2014.

| SWT        | Number of days | Pressure (kPa) | Temperature (°C) | Humid (%)   | Precipitation (mm) | Wind speed (m/s) | Sunshine (hour) |
|------------|----------------|----------------|------------------|-------------|--------------------|------------------|-----------------|
| Hot dry    | 167            | 100.6 ± 0.4    | 28.4 ± 4.0       | 62.0 ± 10.2 | 1.25 ± 4.55        | 3.41 ± 0.91      | 8.79 ± 2.76     |
| Warm humid | 214            | 100.8 ± 0.4    | 23.8 ± 3.8       | 79.9 ± 6.9  | 4.11 ± 8.28        | 2.24 ± 0.63      | 2.25 ± 32.77    |
| Cold dry   | 158            | 102.4 ± 0.4    | 8.0 ± 5.1        | 60.8 ± 13.2 | 0.98 ± 3.43        | 2.82 ± 0.94      | 5.45 ± 3.39     |
| Cool dry   | 225            | 101.7 ± 0.3    | 18.5 ± 3.8       | 66.4 ± 10.8 | 0.32 ± 1.35        | 2.68 ± 0.68      | 6.67 ± 3.30     |
| Cool humid | 107            | 101.1 ± 0.6    | 19.1 ± 6.1       | 82.3 ± 8.3  | 17.28 ± 25.26      | 3.83 ± 1.17      | 8.99 ± 1.76     |
| Cold humid | 225            | 102.5 ± 0.4    | 6.7 ± 3.2        | 72.0 ± 9.6  | 1.81 ± 4.39        | 2.48 ± 0.82      | 3.32 ± 3.36     |

**Table s2.** Daily average levels of the three pollutants by SWT in Shanghai, 2012-2014.

| SWT        | PM <sub>2.5</sub> |                   | SO <sub>2</sub> |              | NO <sub>2</sub> |              |
|------------|-------------------|-------------------|-----------------|--------------|-----------------|--------------|
|            | Mean (SD)         | Median [IQR]      | Mean (SD)       | Median [IQR] | Mean (SD)       | Median [IQR] |
| Hot dry    | 41.2 (29.3)       | 37.6 [17.5, 56.9] | 16.8 (8.9)      | 15 [10, 20]  | 36.2 (21.3)     | 32 [20, 50]  |
| Warm humid | 49.5 (30.1)       | 40.6 [29.4, 58.2] | 14.0 (6.1)      | 12 [10, 16]  | 42.5 (19.1)     | 40 [27, 55]  |
| Cold dry   | 82.8 (50.6)       | 72.3 [53.2, 99.0] | 36.7 (15.4)     | 35 [23, 50]  | 66.7 (28.6)     | 63 [42, 94]  |
| Cool dry   | 49.0 (30.4)       | 41.4 [29.4, 59.0] | 18.3 (8.9)      | 15 [12, 21]  | 48.2 (20.7)     | 45 [31, 63]  |
| Cool humid | 40.4 (25.1)       | 38.6 [21.2, 54.2] | 13.3 (5.8)      | 12 [9, 16]   | 38.6 (17.8)     | 37 [25, 49]  |
| Cold humid | 63.5 (42.9)       | 50.2 [32.9, 85.3] | 26.1 (13.3)     | 21 [16, 35]  | 54.5 (26.8)     | 47 [34, 69]  |
